# Supplementary material
Source: HighWire-hosted journal article supplement (https://bjsm.bmj.com/content/52/2/102)
Supplement: inline-supplementary-material-1 [file inline-supplementary-material-1.docx]

**APPENDIX A - SEARCH STRATEGY**

**EMBASE**

**Medline**

**AMED**

Via Ovid

1. (shoulder or upper extremity).mp. [mp=title, abstract, heading word, drug trade name, original title, device manufacturer, drug manufacturer, device trade name, keyword]
2. (pain or injur* or discomfort or impingement).mp. [mp=title, abstract, heading word, drug trade name, original title, device manufacturer, drug manufacturer, device trade name, keyword]
3. 1 and 2
4. (prospectiv* or risk or likelihood or logistic regression or prognostic or longitudinal or predic* or follow up).mp. [mp=title, abstract, heading word, drug trade name, original title, device manufacturer, drug manufacturer, device trade name, keyword]
5. (scapul* or shoulder blade or shoulder girdle).mp. [mp=title, abstract, heading word, drug trade name, original title, device manufacturer, drug manufacturer, device trade name, keyword]
6. (dyskines* or dysfunction or control or position or sick scapula).mp. [mp=title, abstract, heading word, drug trade name, original title, device manufacturer, drug manufacturer, device trade name, keyword]
7. 5 and 6
8. 3 and 4 and 7
